# Supplementary material
Source: PubMed Central journal article supplement (PMC6485467)
Supplement: NIHMS67145-supplement-File_S1.pdf [file NIHMS67145-supplement-File_S1.pdf]

| Genus                             | Med/Chap<br>Cal/Mex | Nemoral<br>conifer | Laurel | Broad-<br>leaved<br>deciduous | Riparian/<br>aquatic | Liana | Macro<br>Fossils | Pollen | Remarks                  |
|-----------------------------------|---------------------|--------------------|--------|-------------------------------|----------------------|-------|------------------|--------|--------------------------|
| <i>Abies</i>                      |                     |                    |        |                               |                      |       | S                | x      |                          |
| <i>Cathaya</i>                    |                     |                    |        |                               |                      |       |                  | x      |                          |
| <i>Chamaecyparis</i>              |                     |                    |        |                               |                      |       | C, L             |        |                          |
| <i>Ephedra</i>                    |                     |                    |        |                               |                      |       | B                | x      | 2 types (P)              |
| <i>Ginkgo</i>                     |                     |                    |        |                               |                      |       |                  | x      |                          |
| <i>Picea</i>                      |                     |                    |        |                               |                      |       | S                | x      |                          |
| <i>Pinus</i> sect. <i>Pinus</i>   |                     |                    |        |                               |                      |       | C, S, L          | x      | 3 spp. (MF)              |
| <i>Pinus</i> sect. <i>Strobus</i> |                     |                    |        |                               |                      |       | C, S, L          | x      | 2 spp. (MF)              |
| <i>Sequoia</i>                    |                     |                    |        |                               |                      |       | C, B, W          | x      |                          |
| <i>Torreya</i>                    |                     |                    |        |                               |                      |       | L                |        |                          |
| <i>Tsuga</i>                      |                     |                    |        |                               |                      |       |                  | x      |                          |
| <i>Acer</i>                       |                     |                    |        |                               |                      |       | L, Fr            | x      | 3 spp. (MF), 3 types (P) |
| <i>Ailanthus</i>                  |                     |                    |        |                               |                      |       | Fr               | x      |                          |
| <i>Alangium</i>                   |                     |                    |        |                               |                      |       |                  | x      |                          |
| <i>Alnus</i>                      |                     |                    |        |                               |                      |       |                  | x      |                          |
| Amaranthaceae                     |                     |                    |        |                               |                      |       |                  | x      | 3-4 types (P)            |
| <i>Amelanchier</i>                |                     |                    |        |                               |                      |       | L                |        |                          |
| Anacardiaceae                     |                     |                    |        |                               |                      |       | L                | x      |                          |
| Apocynaceae                       |                     |                    |        |                               |                      |       | S                |        |                          |
| Araliaceae                        |                     |                    | ?      |                               |                      |       |                  | x?     |                          |
| Arecaceae                         |                     |                    | ?      |                               |                      |       | L                | x      |                          |
| <b>Asteraceae</b>                 |                     |                    |        |                               |                      |       |                  | x      |                          |
| <i>Athyana</i>                    |                     |                    |        |                               |                      |       | L                | x      |                          |
| <i>Betula</i>                     |                     |                    |        |                               |                      |       |                  | x      |                          |
| Buxaceae                          |                     |                    |        |                               |                      |       |                  | x      |                          |
| <i>Caesalpinia</i>                |                     |                    |        |                               |                      |       | Ll               | x      |                          |
| <i>Carya</i>                      |                     |                    |        |                               |                      |       | L, Ll, Fl, Fr    | x      |                          |
| Castaneoideae                     |                     |                    |        |                               |                      |       | L?               | x      | 3 types (P)              |
| <i>Cedrela</i> or <i>Toona</i>    |                     |                    |        | ?                             |                      |       | S                | x?     |                          |
| <i>Cedrelospermum</i> †           |                     |                    |        |                               |                      |       | L, S             | x      |                          |
| <i>Celtis</i>                     |                     |                    |        |                               |                      |       | L                |        |                          |
| Cercidiphyllaceae                 |                     |                    |        |                               |                      |       |                  | x      |                          |
| <i>Cercis</i>                     |                     |                    |        |                               |                      |       | L, Fr            |        |                          |
| <i>Cercocarpus</i>                |                     |                    |        |                               |                      |       | L, Fr            |        |                          |
| <i>Chaneya tenuis</i> †           |                     |                    |        |                               |                      |       | Fr               |        |                          |
| <i>Cotinus</i>                    |                     |                    |        |                               |                      |       | L                |        |                          |
| <i>Crataegus</i>                  |                     |                    |        |                               |                      |       | L, Fr            | x      | 3 spp. (MF)              |
| <i>Cyclocarya</i>                 |                     |                    |        |                               |                      |       |                  | x      |                          |
| <i>Cyperacites</i>                |                     |                    |        |                               |                      |       | L                | x      |                          |
| <i>Daphne</i>                     |                     |                    |        |                               |                      |       | L                | x      |                          |
| <i>Dioscorea</i>                  |                     |                    |        |                               |                      |       | Fr               |        |                          |
| <i>Diospyros</i>                  |                     |                    |        |                               |                      |       |                  | x      |                          |
| <i>Diplodipelta</i> †             |                     |                    |        |                               |                      |       | Fr               |        |                          |
| <i>Dipteronia</i>                 |                     |                    |        |                               |                      |       | L, Fr            |        |                          |
| Elaeagnaceae                      | ?                   |                    |        |                               |                      |       |                  | x      |                          |
| Engelhardoideae                   |                     |                    |        |                               |                      |       |                  | x      | 2 types (P)              |
| <b>Ericaceae</b>                  |                     |                    |        |                               |                      |       |                  | x      |                          |
| <i>Eucommia</i>                   |                     |                    |        |                               |                      |       | Fr               | x      |                          |
| Euphorbiaceae                     | ?                   |                    |        |                               |                      |       | L                | x      |                          |
| Fabaceae                          |                     |                    |        |                               |                      |       | Ll               | x      | 4 spp. (MF)              |
| <i>Fagopsis</i> †                 |                     |                    |        |                               |                      |       | L, Fl, Fr        | x      |                          |
| <i>Florissantia</i> †             |                     |                    |        |                               |                      |       | Fl, Fr           | x      |                          |
| <i>Fraxinus</i>                   |                     |                    |        |                               |                      |       |                  | x      |                          |
| Hamamelidaceae                    |                     |                    |        |                               |                      |       |                  | x      |                          |
| <i>Holodiscus</i> †               |                     |                    |        |                               |                      |       | L                |        |                          |
| <i>Humulus</i>                    |                     |                    |        |                               |                      |       | L                |        |                          |
| Hydrangeaceae                     |                     |                    |        |                               |                      |       | L, Fl            |        |                          |
| <i>Juglans</i>                    |                     |                    |        |                               |                      |       | S?               | x      |                          |

|                                |  |   |  |                        |           |   |                          |
|--------------------------------|--|---|--|------------------------|-----------|---|--------------------------|
| <i>Koelreuteria</i>            |  | ? |  | ?                      | L?, Fr, W |   |                          |
| Lauraceae                      |  |   |  |                        | L         |   | 2 spp. (MF)              |
| Liliaceae                      |  |   |  |                        |           | x |                          |
| <i>Lonicera</i>                |  |   |  |                        |           | x |                          |
| <i>Mahonia</i>                 |  |   |  |                        | L         |   | 2-3 spp. (MF)            |
| <i>Malus</i>                   |  |   |  |                        | L         |   |                          |
| <b>Malvaceae</b>               |  |   |  |                        |           | x | at least 6 types (P)     |
| Menispermaceae                 |  |   |  |                        |           | x |                          |
| <i>Morus</i>                   |  |   |  |                        | L         |   |                          |
| Nymphaeaceae                   |  |   |  |                        |           | x |                          |
| Onagraceae                     |  |   |  |                        | Fl        | x | 2 types (P)              |
| <b>Oreopanax</b>               |  |   |  |                        | L         |   |                          |
| <i>Osmanthus</i> ?             |  |   |  |                        | L, Fr     | x |                          |
| <i>Ostrya/Carpinus</i>         |  | ? |  |                        |           | x |                          |
| <i>Parac./Asterocarpinus</i> † |  |   |  |                        | Fr, L     | x |                          |
| <i>Platanus</i>                |  |   |  |                        | L         | x |                          |
| <b>Poaceae</b>                 |  |   |  |                        |           | x |                          |
| Polygonaceae                   |  |   |  |                        |           | x |                          |
| <i>Populus</i>                 |  |   |  |                        | L, Fr     |   |                          |
| <i>Potamogeton</i>             |  |   |  |                        | L?, Fr    |   |                          |
| ? <i>Prosopis</i>              |  |   |  |                        | L         |   |                          |
| <i>Quercus</i>                 |  |   |  | <i>Q. lyratiformis</i> | L, Fr     | x | 8 spp. (MF), 4 types (P) |
| Ranunculaceae                  |  |   |  |                        |           | x |                          |
| Rhoipteleaceae                 |  |   |  |                        |           | x |                          |
| <i>Rhus</i>                    |  |   |  |                        | L         |   | 3 spp. (MF)              |
| <i>Ribes</i>                   |  |   |  |                        | L         |   |                          |
| <i>Robinia</i>                 |  |   |  |                        | L, W      |   |                          |
| <b>Rosa</b>                    |  |   |  |                        | L, Ll     |   |                          |
| <b>Rosaceae</b>                |  |   |  |                        |           | x | 4 types (P)              |
| <b>Rubus</b>                   |  |   |  |                        | L         |   |                          |
| Rutaceae                       |  | ? |  |                        | S?        | x |                          |
| <i>Salix</i>                   |  |   |  |                        | L         | x | 4 spp. (MF)              |
| <b>Sambucus</b>                |  |   |  |                        | L, Ll     | x |                          |
| <i>Schmaltzia</i>              |  |   |  |                        | L         |   |                          |
| <i>Smilax</i> ?                |  |   |  |                        | L         |   |                          |
| <i>Sparganium</i>              |  |   |  |                        |           | x |                          |
| <i>Stipa</i>                   |  |   |  |                        | Fr        | x |                          |
| <b>Tabernaemontana</b>         |  |   |  |                        |           | x |                          |
| <i>Tetracentron</i>            |  |   |  |                        |           | x |                          |
| Thymeleaceae                   |  |   |  |                        |           | x |                          |
| <i>Tilia</i> ?                 |  |   |  |                        | L         | x |                          |
| <i>Typha</i>                   |  |   |  |                        | L         | x |                          |
| Ulmaceae                       |  |   |  |                        | W         | x |                          |
| <i>Ulmus</i>                   |  |   |  |                        | L, F      | x |                          |
| <i>Vauquelinia</i>             |  |   |  |                        | L         |   | 2 spp. (MF)              |
| <i>Viburnum</i>                |  |   |  |                        |           | x |                          |
| Vitaceae                       |  |   |  |                        |           | x | 2 types (P)              |
| <i>Vitis</i>                   |  |   |  |                        | L         | x |                          |
| " <i>Zelkova</i> "             |  |   |  |                        |           | x |                          |

Macro fossils: L-leaf, Ll-leaflet, B-branch, C-cone, Fr-fruit, S-seed, W-wood, Fl-flower.

† = extinct; Remarks: MF-macro fossils, P-pollen. Red = unknown or indifferent
