# Supplementary material
Source: PubMed Central journal article supplement (PMC6485467)

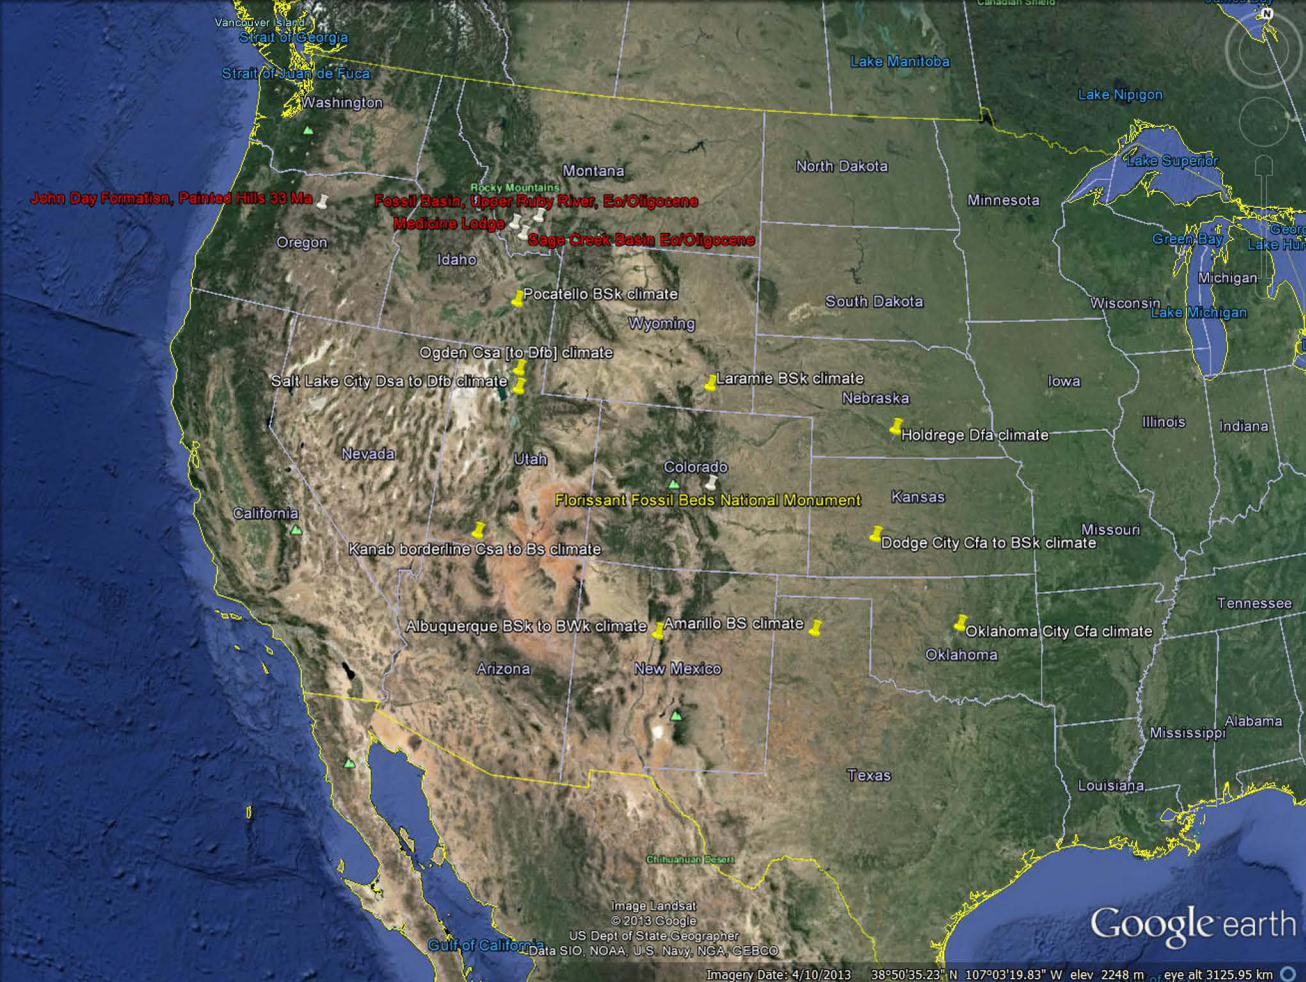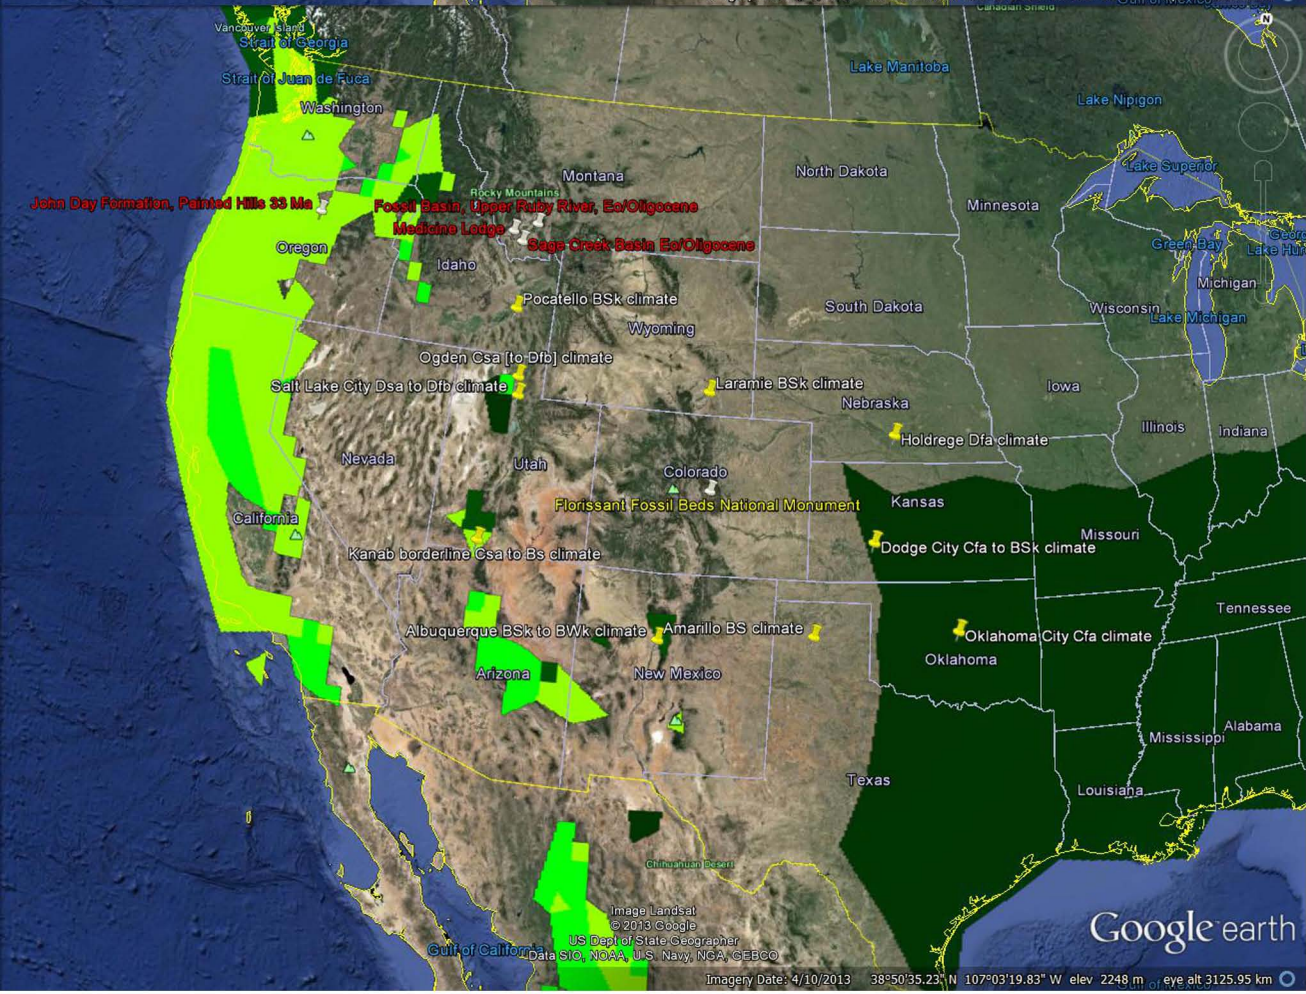

Distribution of temperate climates in the USA.  
 Cf climates are fully humid; Cs climates are summer dry (see Kottek et al., 2006 for details).

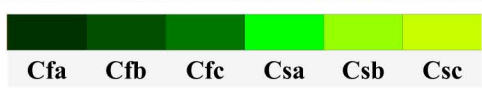

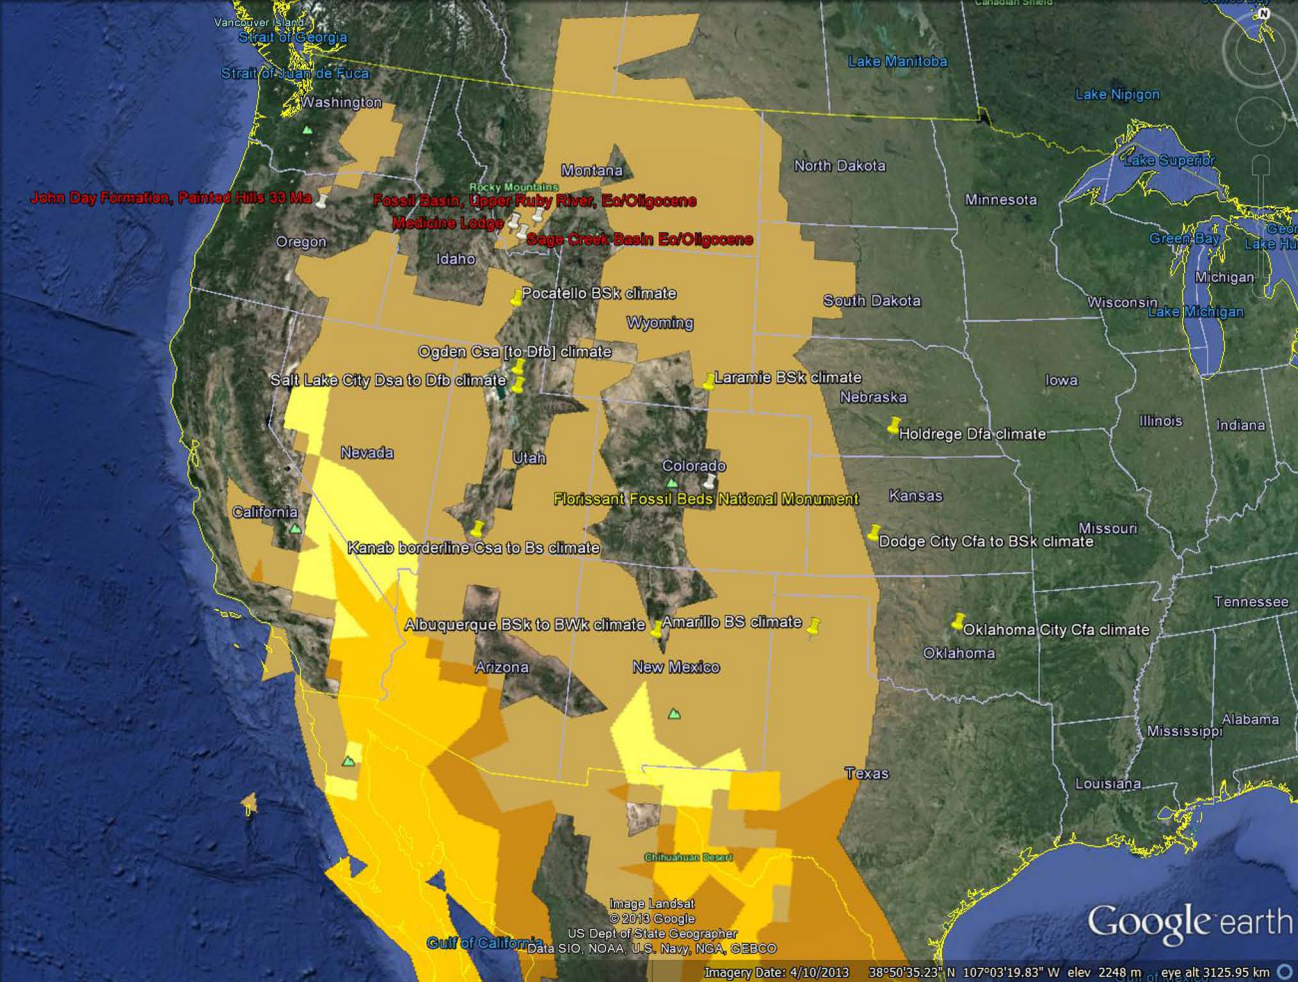

Distribution of dry climates in the USA.

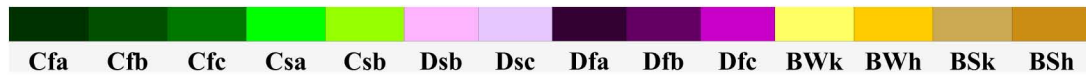

Distribution of temperate, dry, and snow climates in the USA

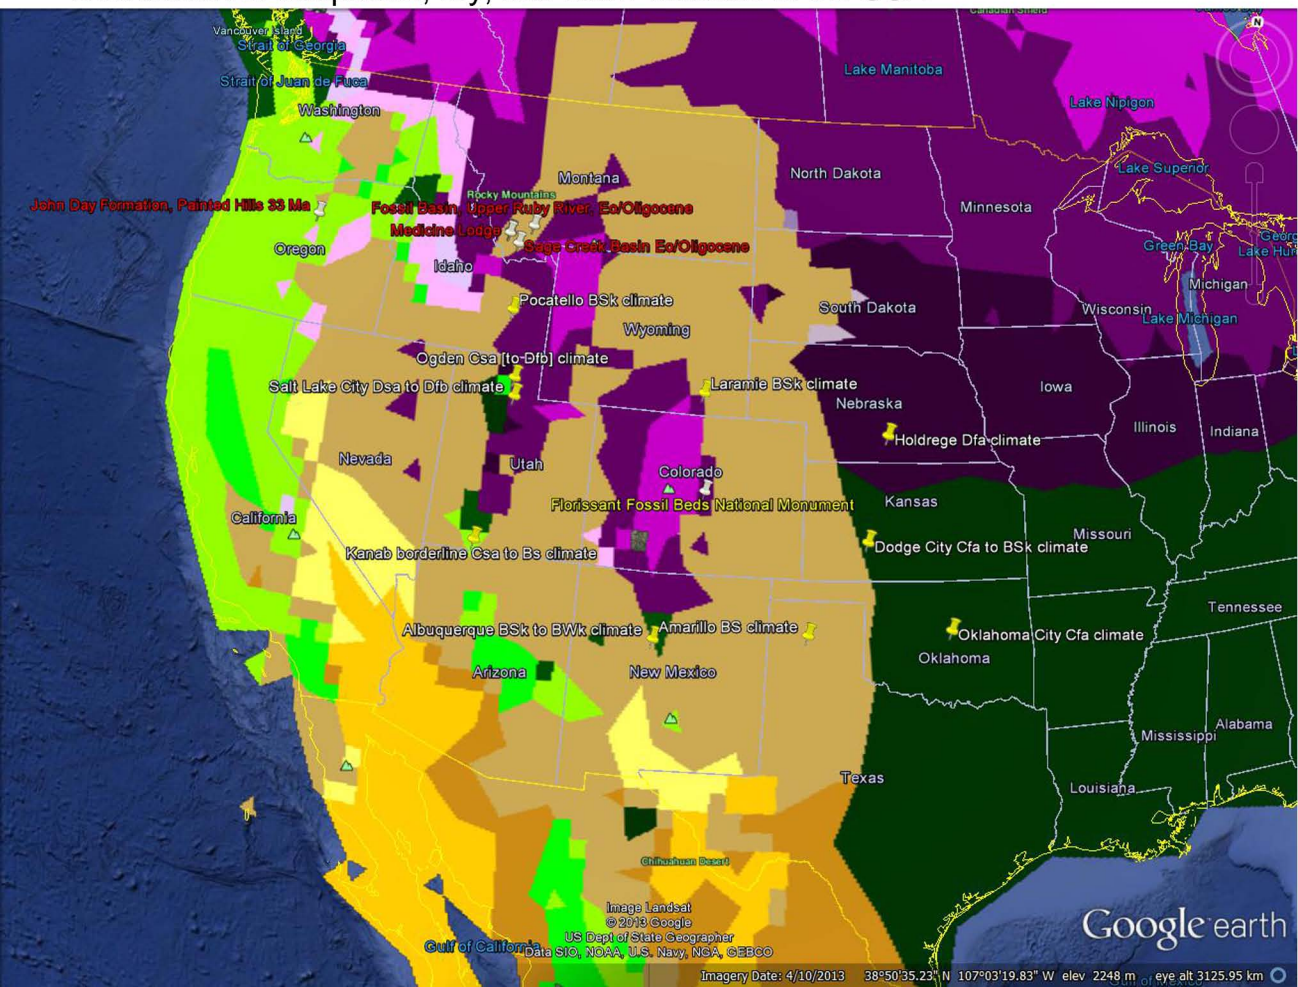

Supplement: NIHMS67145-supplement-File_S2.pdf [file NIHMS67145-supplement-File_S2.pdf]
